# Supplementary material for: Antidepressive-like Behavior-Related Metabolomic Signatures of Sigma-1 Receptor Knockout Mice
Source: MDPI journal article supplement (doi:10.3390/biomedicines10071572), 2022-07-01
Supplement: s1 [file s1]

**Supplementary Table S1.** Measured and detected metabolites using MxP<sup>®</sup> Quant 500 kit for targeted metabolic profiling in mouse plasma and brain tissue.

| <b>Biochemical classes</b> | <b>Measured metabolites</b> | <b>Detected metabolites</b> |              |
|----------------------------|-----------------------------|-----------------------------|--------------|
|                            |                             | <b>PLASMA</b>               | <b>BRAIN</b> |
| Alkaloids                  | <b>1</b>                    | 1                           | 0            |
| Amine Oxides               | <b>1</b>                    | 1                           | 0            |
| Amino Acids                | <b>20</b>                   | 20                          | 20           |
| Amino Acid Related         | <b>30</b>                   | 23                          | 12           |
| Bile Acids                 | <b>14</b>                   | 6                           | 0            |
| Biogenic Amines            | <b>9</b>                    | 6                           | 6            |
| Carbohydrates and Related  | <b>1</b>                    | 1                           | 0            |
| Carboxylic Acids           | <b>7</b>                    | 3                           | 4            |
| Cresols                    | <b>1</b>                    | 1                           | 0            |
| Fatty Acids                | <b>12</b>                   | 3                           | 4            |
| Hormones and Related       | <b>4</b>                    | 0                           | 0            |
| Indoles and Derivatives    | <b>4</b>                    | 3                           | 0            |
| Nucleobases and Related    | <b>2</b>                    | 0                           | 2            |
| Vitamins and Cofactors     | <b>1</b>                    | 1                           | 1            |
| Acylcarnitines             | <b>40</b>                   | 8                           | 14           |
| Lysophosphatidylcholines   | <b>14</b>                   | 8                           | 7            |
| Phosphatidylcholines       | <b>76</b>                   | 72                          | 66           |
| Sphingomyelins             | <b>15</b>                   | 13                          | 11           |
| Ceramides                  | <b>28</b>                   | 7                           | 13           |
| Dihydroceramides           | <b>8</b>                    | 0                           | 0            |
| Hexosylceramides           | <b>19</b>                   | 4                           | 13           |
| Dihexosylceramides         | <b>9</b>                    | 2                           | 1            |
| Trihexosylceramides        | <b>6</b>                    | 0                           | 0            |
| Cholesteryl Esters         | <b>22</b>                   | 10                          | 0            |
| Diglycerides               | <b>44</b>                   | 10                          | 5            |
| Triglycerides              | <b>242</b>                  | 170                         | 0            |
| <b>TOTAL</b>               | <b>630</b>                  | <b>373</b>                  | <b>179</b>   |

**Supplementary Table S2.** Primer sequences of the genes used in this study.

| Gene symbol | Full name                                         | NCBI Accession number | Forward primer sequence (5'→3') | Reverse primer sequence (5'→3') | Amplification length, bp |
|-------------|---------------------------------------------------|-----------------------|---------------------------------|---------------------------------|--------------------------|
| Actb        | Actin, beta                                       | NM_007393.5           | CCTCTATGCCAACACAGTGC            | CATCGTACTCCTGCTTGCTG            | 215                      |
| Dnajc14     | DnaJ heat shock protein family (Hsp40) member C14 | NM_001359825.1        | AGTGACCCGACTCTTGACCA            | TCTGCCATCCGTTTCATCTCA           | 249                      |
| Drd1        | Dopamine receptor D1                              | NM_010076.3           | GTCTCCCAGATCGGGCATTT            | CAGTCACTTTTCGGGGATGC            | 111                      |
| Drd2        | dopamine receptor D2                              | NM_010077.3           | ATCGTCTCGTTCTACGTGCC            | TGGGTACAGTTGCCCTTGAG            | 155                      |
| Gabbr2      | gamma-aminobutyric acid (GABA) B receptor, 2      | NM_001081141.2        | ATCGAGCAGATCCGCAACGAG           | ACACAACCTTGACCCGTGAC            | 997                      |
| Htr1a       | 5-hydroxytryptamine (serotonin) receptor 1A       | NM_008308.4           | CCCCCTTTCAAGGAACAGCA            | GAGCCCAGAGATCTGCGAAA            | 102                      |
| Htr1b       | 5-hydroxytryptamine (serotonin) receptor 1B       | NM_010482.2           | GGAGCGCAAAGACTCAAAGC            | TCTCAGGTTCCCTTGTCCT             | 116                      |
| Htr2a       | 5-hydroxytryptamine (serotonin) receptor 2A       | NM_172812.3           | TCCTGTATGGGTACCGGTGG            | ATGGTCCACACCGCAATGAT            | 202                      |
| Htr2c       | 5-hydroxytryptamine (serotonin) receptor 2C       | NM_008312.4           | GGACGCTAGTGGGTGTGCAC            | GGCCAATTAGGTGCAACAAGG           | 189                      |

|         |                                             |             |                              |                             |             |
|---------|---------------------------------------------|-------------|------------------------------|-----------------------------|-------------|
| Htr3a   | 5-hydroxytryptamine (serotonin) receptor 3A | NM_013561.2 | GATGACTGCTCAGGT<br>TCTGATCTT | GTGGTGGAAGAGGG<br>CTACCT    | 115         |
| Pgrmc1  | Progesterone receptor membrane component 1  | NM_016783.4 | GGCAAGGTGTTCGAC<br>GTGA      | GTCCAGGCAAAATG<br>TGGCAA    | 111         |
| Sigmar1 | Sigma non-opioid intracellular receptor 1   | NM_011014.3 | CATTCGGGACGATAC<br>TGGGC     | CCTGGGTAGAAGAC<br>CTCACTTTT | 101         |
| Sigmar1 | Sigma non-opioid intracellular receptor 1   | NM_011014.3 | CTCGCTGTCTGAGTA<br>CGTG      | AAGAAAGTGTCGGC<br>TAGTGCAA  | 186<br>/279 |
| Tph2    | Tryptophan hydroxylase 2                    | NM_173391.3 | CTCACCGAGTCCTCA<br>TGTACG    | TGGCCACATCCACA<br>AAATACTTC | 102         |

**Supplementary Table S3.** Significantly altered metabolite in adult Sig1R KO mice plasma.

| <b>ADULT mice PLASMA</b> |                                    |                           |                   |                |
|--------------------------|------------------------------------|---------------------------|-------------------|----------------|
| <b>Group</b>             | <b>Metabolite</b>                  | <b>Concentration (μM)</b> | <b>Down or Up</b> | <b>P value</b> |
| Amino acids              | Alanine (Ala)                      | 286.9                     | Up                | 0.006          |
|                          | Arginine (Arg)                     | 72.9                      | Up                | 0.003          |
|                          | Asparagine (Asn)                   | 26.2                      | Up                | 0.002          |
|                          | Glutamine (Gln)                    | 460.5                     | Up                | 0.022          |
|                          | Glutamate (Glu)                    | 20.1                      | Down              | 0.041          |
|                          | Glycine (Gly)                      | 214                       | Down              | 0.014          |
|                          | Histidine (His)                    | 76.7                      | Down              | 0.003          |
|                          | Isoleucine (Ile)                   | 47.6                      | Down              | 0.001          |
|                          | Leucine (Leu)                      | 72.1                      | Down              | 0.001          |
|                          | Lysine (Lys)                       | 235                       | Down              | 0.015          |
|                          | Methionine (Met)                   | 38.4                      | Down              | 4.84E-05       |
|                          | Phenylalanine (Phe)                | 56.6                      | Down              | 0.001          |
|                          | Proline (Pro)                      | 72.7                      | Down              | 0.004          |
|                          | Serine (Ser)                       | 102.7                     | Up                | 0.046          |
|                          | Threonine (Thr)                    | 107.3                     | Down              | 5.71E-05       |
|                          | Valine (Val)                       | 135.3                     | Down              | 4.56E-05       |
| Amino acids related      | alpha-AAA                          | 1.3                       | Down              | 0.004          |
|                          | Asymmetric dimethylarginine (ADMA) | 0.7                       | Up                | 0.044          |
|                          | Anserine                           | 0.6                       | Up                | 0.002          |
|                          | beta-aminobutyric acid (BABA)      | 0.3                       | Down              | 0.046          |
|                          | Carnosine                          | 0.4                       | Up                | 0.045          |
|                          | Citrulline                         | 63.3                      | Up                | 0.001          |
|                          | Methionine sulfoxide               | 2.2                       | Down              | 0.003          |
|                          | Ornithine                          | 59.1                      | Up                | 0.018          |
|                          | Sarcosine                          | 1.1                       | Down              | 1.63E-04       |
|                          | Taurine                            | 196.7                     | Down              | 0.025          |
| Bile Acids               | Taurocholic acid (TCA)             | 0.027                     | Down              | 0.011          |
|                          | Tauromurocholic acid (TMCA)        | 0.026                     | Down              | 0.045          |
| Biogenic Amines          | GABA                               | 0.128                     | Up                | 0.034          |
|                          | Histamine                          | 2                         | Up                | 0.004          |
| Carboxylic Acids         | Hippuric acid                      | 2.4                       | Down              | 0.001          |
|                          | Lactic acid                        | 3936.2                    | Down              | 0.042          |
|                          | Succinic acid                      | 18                        | Up                | 0.039          |
| Indoles and Derivatives  | 3-Indoleacetic acid                | 0.3                       | Up                | 0.036          |
|                          | 3-Indolepropionic acid             | 2.3                       | Up                | 0.016          |

|                          |                         |       |      |          |
|--------------------------|-------------------------|-------|------|----------|
|                          | Indoxyl sulfate         | 4.6   | Down | 0.009    |
| Acylcarnitines           | Acetylcarnitine (C2)    | 5.2   | Down | 2.19E-05 |
|                          | Propionylcarnitine (C3) | 0.17  | Down | 1.47E-04 |
|                          | Butyrylcarnitine (C4)   | 0.24  | Up   | 5.08E-04 |
|                          | Valerylcarnitine (C5)   | 0.08  | Down | 0.016    |
| Lysophosphatidylcholines | lysoPC a C16:0          | 134.8 | Down | 1.64E-04 |
| Phosphatidylcholines     | PC aa C30:2             | 0.39  | Up   | 0.041    |
|                          | PC aa C32:0             | 9.55  | Down | 3.11E-05 |
|                          | PC aa C32:1             | 12.63 | Down | 0.003    |
|                          | PC aa C32:3             | 0.26  | Up   | 0.023    |
|                          | PC aa C34:1             | 177.3 | Down | 0.002    |
|                          | PC aa C34:2             | 314.7 | Down | 0.006    |
|                          | PC aa C34:3             | 11.8  | Up   | 0.050    |
|                          | PC aa C36:1             | 30.5  | Down | 0.012    |
|                          | PC aa C36:3             | 116.4 | Down | 0.029    |
|                          | PC aa C36:4             | 161.3 | Up   | 0.050    |
|                          | PC aa C36:5             | 6     | Up   | 0.040    |
|                          | PC aa C38:1             | 1.1   | Down | 0.028    |
|                          | PC aa C42:0             | 0.16  | Down | 0.009    |
|                          | PC ae C34:1             | 5     | Down | 0.014    |
|                          | PC ae C36:0             | 0.4   | Up   | 0.022    |
|                          | PC ae C36:1             | 3.7   | Up   | 0.023    |
|                          | PC ae C38:1             | 1.4   | Down | 0.012    |
|                          | PC ae C38:2             | 9.7   | Down | 0.014    |
|                          | PC ae C40:2             | 0.42  | Down | 0.034    |
|                          | PC ae C40:6             | 1.84  | Up   | 0.046    |
|                          | PC ae C42:1             | 0.37  | Up   | 0.045    |
| Sphingomyelins           | SM (OH) C14:1           | 1.23  | Up   | 0.009    |
|                          | SM C16:0                | 13.3  | Down | 0.007    |
|                          | SM C16:1                | 3     | Up   | 0.039    |
|                          | SM C24:0                | 5.8   | Down | 0.007    |
| Ceramides                | Cer(d18:1/16:0)         | 0.06  | Down | 0.006    |
|                          | Cer(d18:1/23:0)         | 0.191 | Down | 0.004    |
|                          | Cer(d18:1/24:0)         | 0.417 | Down | 0.001    |
|                          | Cer(d18:1/24:1)         | 0.437 | Up   | 0.023    |
| Cholesteryl esters       | CE(16:0)                | 56.4  | Down | 0.007    |
|                          | CE(18:2)                | 439.9 | Down | 0.035    |
| Diglycerides             | DG(18:1_18:2)           | 9.1   | Up   | 0.045    |
| Triglycerides            | TG(16:0_32:0)           | 18.4  | Down | 0.019    |
|                          | TG(16:0_32:1)           | 35.5  | Down | 0.023    |
|                          | TG(16:0_34:0)           | 13.2  | Down | 0.040    |
|                          | TG(16:0_34:1)           | 128.9 | Down | 0.041    |
|                          | TG(16:1_32:0)           | 12    | Down | 0.019    |

---

|               |     |      |       |
|---------------|-----|------|-------|
| TG(18:0_32:1) | 2.5 | Down | 0.041 |
| TG(20:3_36:3) | 3.9 | Up   | 0.039 |
| TG(22:5_34:2) | 7.9 | Up   | 0.043 |
| TG(22:5_34:3) | 0.9 | Up   | 0.017 |

---

**Supplementary Table S4.** Significantly altered metabolite in old Sig1R KO mice plasma.

| OLD mice PLASMA          |                               |                    |            |                |
|--------------------------|-------------------------------|--------------------|------------|----------------|
| Group                    | Metabolite                    | Concentration (μM) | Down or Up | <i>P</i> value |
| Amine oxides             | TMAO                          | 5.8                | Up         | 0.029          |
| Amino acids              | Methionine (Met)              | 41.2               | Down       | 0.038          |
| Amino acids related      | alpha-AAA                     | 1.7                | Down       | 0.043          |
|                          | beta-aminobutyric acid (BABA) | 0.4                | Up         | 0.047          |
|                          | Kynurenine                    | 1.4                | Up         | 0.005          |
|                          | Phenylacetylglutamine (PAG)   | 3.8                | Up         | 0.025          |
| Biogenic amines          | Histamine                     | 3.1                | Up         | 0.002          |
|                          | Serotonin                     | 0.4                | Up         | 0.028          |
| Carboxylic acids         | Hippuric acid                 | 6.4                | Up         | 8.17E-04       |
| Indoles and derivatives  | Indoxyl sulfate               | 14.1               | Up         | 0.003          |
| Acylcarnitines           | Acetylcarnitine (C2)          | 6.3                | Up         | 0.025          |
|                          | Butyrylcarnitine (C4)         | 0.31               | Up         | 0.028          |
|                          | Valerylcarnitine (C5)         | 0.08               | Up         | 0.045          |
| Lysophosphatidylcholines | lysoPC a C16:0                | 119.8              | Up         | 0.004          |
|                          | lysoPC a C16:1                | 4.8                | Down       | 0.030          |
|                          | lysoPC a C18:1                | 49.8               | Down       | 0.005          |
|                          | lysoPC a C20:3                | 8                  | Down       | 0.038          |
| Phosphatidylcholines     | PC aa C32:0                   | 9.38               | Down       | 0.030          |
|                          | PC aa C32:1                   | 7.61               | Down       | 0.027          |
|                          | PC aa C34:1                   | 129.1              | Down       | 0.008          |
|                          | PC aa C34:4                   | 0.5                | Down       | 0.038          |
|                          | PC aa C36:1                   | 21.6               | Down       | 0.011          |
|                          | PC aa C36:4                   | 118.8              | Down       | 0.040          |
|                          | PC aa C38:3                   | 26.2               | Down       | 0.049          |
|                          | PC aa C38:4                   | 72.2               | Up         | 0.046          |
|                          | PC aa C38:5                   | 54.7               | Up         | 0.014          |
|                          | PC aa C42:4                   | 0.13               | Up         | 0.011          |
|                          | PC ae C36:0                   | 0.3                | Down       | 0.009          |
|                          | PC ae C38:5                   | 2.7                | Down       | 0.007          |
|                          | PC ae C38:6                   | 0.98               | Down       | 0.040          |
|                          | PC ae C44:6                   | 0.12               | Down       | 0.003          |
| Sphingomyelins           | SM C16:0                      | 11.3               | Down       | 0.025          |
|                          | SM C16:1                      | 1.6                | Down       | 0.014          |
| Ceramides                | Cer(d18:1/16:0)               | 0.06               | Down       | 0.004          |
|                          | Cer(d18:1/24:1)               | 0.492              | Down       | 1.57E-04       |
| Hexosylceramides         | HexCer(d18:1/22:0)            | 1.2                | Up         | 0.045          |

|                    |                     |       |      |          |
|--------------------|---------------------|-------|------|----------|
|                    | HexCer(d18:1/24:0)  | 0.2   | Down | 6.48E-04 |
|                    | HexCer(d18:1/24:1)  | 1.5   | Down | 8.91E-07 |
| Dihexosylceramides | Hex2Cer(d18:1/24:1) | 0.157 | Down | 0.004    |
| Cholesteryl esters | CE(14:0)            | 3.2   | Down | 0.036    |
|                    | CE(20:4)            | 430.9 | Up   | 0.012    |
|                    | CE(22:6)            | 52.1  | Up   | 0.023    |
| Diglycerides       | DG(17:0_18:1)       | 1.1   | Up   | 0.013    |
| Triglycerides      | TG(20:4_36:4)       | 1.5   | Up   | 0.039    |



**Supplementary Table S5.** Significantly altered metabolite in adult Sig1R KO mice brain.

| <b>ADULT mice BRAIN</b> |                       |                                           |                       |                       |
|-------------------------|-----------------------|-------------------------------------------|-----------------------|-----------------------|
| <b>Group</b>            | <b>Metabolite</b>     | <b>Concentration<br/>(pmol/mg tissue)</b> | <b>Down<br/>or Up</b> | <b><i>P</i> value</b> |
| Amino acids             | Ala                   | 1001.9                                    | Down                  | 0.013                 |
|                         | Thr                   | 363.9                                     | Down                  | 6.15E-04              |
| Amino Acids related     | alpha-AAA             | 45.6                                      | Down                  | 0.018                 |
|                         | Citrulline            | 11.6                                      | Down                  | 0.020                 |
|                         | Cystine               | 2.1                                       | Up                    | 0.034                 |
|                         | 3-Met-His             | 3.6                                       | Up                    | 0.023                 |
| Fatty acids             | Arachidonic acid (AA) | 350.9                                     | Down                  | 0.033                 |
| Phosphatidylcholines    | PC aa C36:1           | 206.2                                     | Down                  | 0.035                 |
|                         | PC aa C38:1           | 2.9                                       | Up                    | 4.31E-04              |
|                         | PC aa C40:2           | 1.3                                       | Up                    | 3.89E-04              |
|                         | PC aa C42:1           | 0.4                                       | Up                    | 0.001                 |
|                         | PC aa C42:2           | 0.7                                       | Up                    | 2.69E-05              |
|                         | PC ae C36:1           | 9.9                                       | Down                  | 0.015                 |
|                         | PC ae C36:2           | 3.9                                       | Down                  | 0.016                 |
|                         | PC ae C36:3           | 1.6                                       | Up                    | 0.028                 |
|                         | PC ae C38:1           | 1.3                                       | Up                    | 0.012                 |
|                         | PC ae C38:2           | 1.1                                       | Up                    | 0.002                 |
|                         | PC ae C38:3           | 1.1                                       | Down                  | 0.015                 |
|                         | PC ae C40:2           | 0.5                                       | Up                    | 0.031                 |
|                         | PC ae C40:4           | 1.1                                       | Up                    | 0.020                 |
|                         | PC ae C40:5           | 1.2                                       | Up                    | 0.009                 |
|                         | PC ae C42:2           | 1.9                                       | Up                    | 0.029                 |
|                         | PC ae C44:6           | 0.4                                       | Up                    | 0.039                 |
| Sphingomyelins          | SM C18:1              | 24.82                                     | Down                  | 0.017                 |
|                         | SM C24:0              | 3.0                                       | Down                  | 0.024                 |
| Ceramides               | Cer (d18:1/22:0)      | 0.26                                      | Up                    | 0.012                 |
|                         | Cer (d18:1/24:0)      | 0.35                                      | Up                    | 0.004                 |
|                         | Cer (d18:1/24:1)      | 4.93                                      | Up                    | 0.004                 |
|                         | Cer (d18:1/25:0)      | 1.88                                      | Up                    | 0.019                 |
| Hexosylceramides        | HexCer (d18:1/20:0)   | 1.23                                      | Up                    | 0.037                 |
|                         | HexCer (d18:1/22:0)   | 7.89                                      | Up                    | 0.008                 |
|                         | HexCer (d18:1/24:0)   | 2.47                                      | Up                    | 0.014                 |
|                         | HexCer (d18:1/24:1)   | 91.99                                     | Up                    | 0.002                 |
| Dihexosylceramides      | Hex2Cer (d18:1/18:0)  | 2.02                                      | Up                    | 0.037                 |

**Supplementary Table S6.** Significantly altered metabolite in old Sig1R KO mice brain.

| OLD mice BRAIN           |                                 |                                      |               |                |
|--------------------------|---------------------------------|--------------------------------------|---------------|----------------|
| Group                    | Metabolite                      | Concentration<br>(pmol/mg<br>tissue) | Down or<br>Up | <i>P</i> value |
| Amino acids              | Phenylalanine (Phe)             | 83.7                                 | Up            | 0.043          |
|                          | Threonine (Thr)                 | 314.1                                | Down          | 0.005          |
|                          | Tryptophan (Trp)                | 23.8                                 | Up            | 0.005          |
|                          | Tyrosine (Tyr)                  | 105.2                                | Up            | 0.003          |
| Amino acids related      | Anserine                        | 6.5                                  | Up            | 0.020          |
|                          | SDMA                            | 0.477                                | Up            | 0.013          |
| Carboxylic acids         | Aconitic Acid                   | 7.7                                  | Up            | 0.020          |
| Vitamins and cofactors   | Choline                         | 287.6                                | Down          | 0.020          |
| Acylcarnitines           | Carnitine (C0)                  | 99.1                                 | Up            | 0.001          |
|                          | Acetylcarnitine (C2)            | 37                                   | Up            | 0.010          |
|                          | Propionylcarnitine (C3)         | 1.51                                 | Up            | 0.012          |
|                          | Hydroxybutyrylcarnitine (C4-OH) | 0.77                                 | Up            | 0.007          |
|                          | Butyrylcarnitine (C4)           | 1.365                                | Up            | 0.010          |
|                          | Hydroxyvalerylcarnitine (C5-OH) | 1.12                                 | Up            | 0.018          |
|                          | Tetradecanoylcarnitine (C14)    | 0.83                                 | Down          | 0.010          |
|                          | Hexadecanoylcarnitine (C16)     | 1.4                                  | Down          | 0.007          |
|                          | Hexadecenoylcarnitine (C16:1)   | 0.4                                  | Down          | 0.016          |
|                          | Octadecenoylcarnitine (C18:1)   | 1                                    | Down          | 0.001          |
| Lysophosphatidylcholines | lysoPC a C20:4                  | 6                                    | Down          | 0.004          |
| Ceramides                | Cer(d18:1/18:0)                 | 2.65                                 | Up            | 0.027          |
| Hexosylceramides         | HexCer (d18:1/18:0)             | 4.08                                 | Up            | 0.039          |
|                          | HexCer (d18:1/22:0)             | 7.74                                 | Up            | 0.047          |
|                          | HexCer (d18:2/24:0)             | 2.75                                 | Up            | 0.016          |
| Dihexosyl-ceramides      | Hex2Cer (d18:1/18:0)            | 2.39                                 | Up            | 0.011          |
| Diglycerides             | DG (17:0 18:1)                  | 4.21                                 | Up            | 0.037          |

**Supplementary Table S7.** Result from Pathway Analysis.

| <b>Pathway name</b>                                 | <b>Total</b> | <b>Hits</b> | <b>Raw p</b> | <b>Holm p</b> | <b>FDR p</b> | <b>Impact</b> |
|-----------------------------------------------------|--------------|-------------|--------------|---------------|--------------|---------------|
| Phenylalanine metabolism                            | 12           | 4           | 1.91E-6      | 8.20E-5       | 8.19E-5      | 0.36          |
| Valine, leucine and isoleucine biosynthesis         | 8            | 4           | 2.19E-5      | 9.19E-4       | 4.70E-4      | 0.0           |
| Aminoacyl-tRNA biosynthesis                         | 48           | 20          | 1.59E-4      | 6.53E-3       | 2.29E-3      | 0.17          |
| Valine, leucine and isoleucine degradation          | 40           | 3           | 3.16E-4      | 0.013         | 3.40E-3      | 0.0           |
| Histidine metabolism                                | 16           | 7           | 5.36E-4      | 0.021         | 4.30E-3      | 0.55          |
| Glycerophospholipid metabolism                      | 36           | 3           | 6.18E-4      | 0.023         | 4.30E-3      | 0.14          |
| Glycine, serine and threonine metabolism            | 34           | 7           | 7.00E-4      | 0.026         | 4.30E-3      | 0.64          |
| Arginine biosynthesis                               | 14           | 6           | 1.85E-3      | 0.067         | 8.21E-3      | 0.48          |
| beta-Alanine metabolism                             | 21           | 6           | 2.21E-3      | 0.077         | 8.21E-3      | 0.46          |
| Alanine, aspartate and glutamate metabolism         | 28           | 7           | 2.25E-3      | 0.077         | 8.21E-3      | 0.62          |
| Arginine and proline metabolism                     | 38           | 7           | 2.32E-3      | 0.077         | 8.21E-3      | 0.5           |
| Pantothenate and CoA biosynthesis                   | 19           | 4           | 2.55E-3      | 0.082         | 8.21E-3      | 0.02          |
| Sphingolipid metabolism                             | 21           | 2           | 2.94E-3      | 0.091         | 8.21E-3      | 0.27          |
| Arachidonic acid metabolism                         | 36           | 1           | 3.05E-3      | 0.091         | 8.21E-3      | 0.0           |
| Linoleic acid metabolism                            | 5            | 1           | 3.05E-3      | 0.092         | 8.21E-3      | 0.0           |
| alpha-Linolenic acid metabolism                     | 13           | 1           | 3.05E-3      | 0.092         | 8.21E-3      | 0.0           |
| Lysine degradation                                  | 25           | 2           | 3.38E-3      | 0.092         | 8.53E-3      | 0.14          |
| Phenylalanine, tyrosine and tryptophan biosynthesis | 4            | 2           | 5.34E-3      | 0.139         | 0.013        | 1.0           |
| Selenocompound metabolism                           | 20           | 1           | 6.22E-3      | 0.155         | 0.014        | 0.0           |
| Butanoate metabolism                                | 15           | 3           | 6.61E-3      | 0.159         | 0.014        | 0.03          |
| Cysteine and methionine metabolism                  | 33           | 6           | 8.61E-3      | 0.198         | 0.018        | 0.4           |

|                                         |    |   |       |       |       |       |
|-----------------------------------------|----|---|-------|-------|-------|-------|
| Glyoxylate and dicarboxylate metabolism | 32 | 4 | 0.011 | 0.249 | 0.022 | 0.15  |
| Taurine and hypotaurine metabolism      | 8  | 3 | 0.012 | 0.251 | 0.022 | 0.43  |
| Biotin metabolism                       | 10 | 1 | 0.015 | 0.300 | 0.024 | 0.0   |
| D-Glutamine and D-glutamate metabolism  | 6  | 2 | 0.015 | 0.300 | 0.024 | 0.5   |
| Nitrogen metabolism                     | 6  | 2 | 0.015 | 0.300 | 0.024 | 0.0   |
| Porphyrin and chlorophyll metabolism    | 30 | 2 | 0.015 | 0.300 | 0.024 | 0.0   |
| Purine metabolism                       | 66 | 1 | 0.022 | 0.347 | 0.033 | 0.0   |
| Tryptophan metabolism                   | 41 | 4 | 0.028 | 0.416 | 0.041 | 0.34  |
| Glutathione metabolism                  | 28 | 6 | 0.032 | 0.451 | 0.046 | 0.13  |
| Propanoate metabolism                   | 23 | 2 | 0.034 | 0.451 | 0.047 | 0.0   |
| Citrate cycle (TCA cycle)               | 20 | 1 | 0.039 | 0.463 | 0.052 | 0.032 |
| Glycolysis / Gluconeogenesis            | 26 | 1 | 0.042 | 0.463 | 0.053 | 0.0   |
| Pyruvate metabolism                     | 22 | 1 | 0.042 | 0.463 | 0.053 | 0.0   |
| Tyrosine metabolism                     | 42 | 1 | 0.060 | 0.540 | 0.071 | 0.13  |

The table shows the detailed results from the pathway analysis. Since there are tested many pathways at the same time, the statistical  $P$  values from enrichment analysis are further adjusted for multiple testing. The Total is the total number of compounds in the pathway; the Hits is the actually matched number from the uploaded data; the Raw  $P$  is the original p value calculated from the enrichment analysis; the Holm  $P$  is the p value adjusted by Holm-Bonferroni method; the FDR  $P$  is the  $P$  value adjusted using False Discovery Rate; the Impact is the pathway impact value calculated from pathway topology analysis.

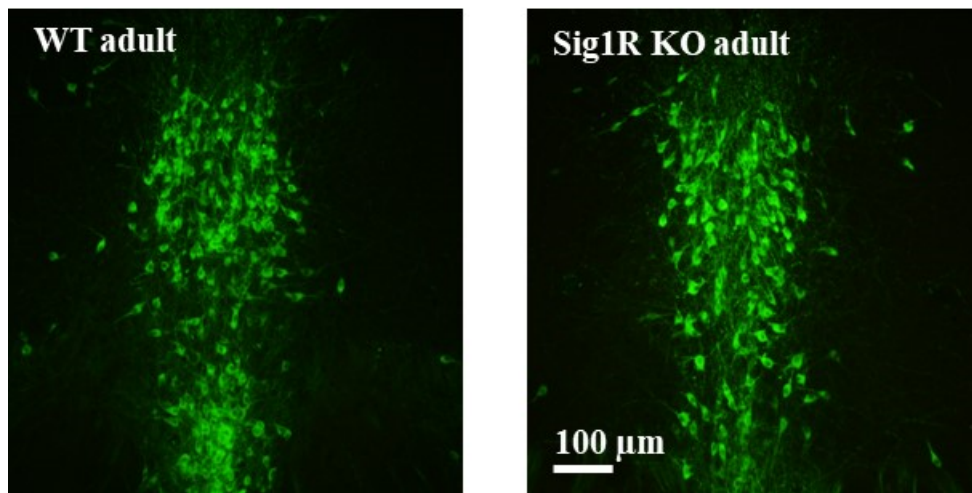

**Supplementary Figure S1.** Representative images of immunofluorescence staining of TPH2 in adult WT and Sig1R KO animals.
